## **Effects of *Catha Edulis Forsk* on Spatial Cognition and correlation with serum electrolytes in Wild- type Male White Albino Rats**

Abebaye Aragaw Limenie<sup>1\*</sup>, Tesfaye Tolessa Dugul<sup>2</sup>, Eyasu Mekonnen Eshetu<sup>3</sup>

<sup>1</sup>Department of Physiology, Addis Ababa University, College of Health Sciences, Addis Ababa, Ethiopia

<sup>2</sup> Department of Physiology, Addis Ababa University, College of Health Sciences, Addis Ababa, Ethiopia

<sup>3</sup> Department of Pharmacology, Addis Ababa University, College of Health Sciences, Addis Ababa, Ethiopia

\*Corresponding Author

E-mail: [abebaye.aragaw@aau.edu.et](mailto:abebaye.aragaw@aau.edu.et)

### Authors' contribution

All authors made a significant contribution to the work reported, whether that is in the conception, study design, execution, acquisition of data, analysis, and interpretation, and preparing the manuscript. They also took part in drafting, revising, or critically reviewing the article; gave final approval of the version to be published; have agreed on the journal to which the article has been submitted; and agree to be accountable for all aspects of the work.

**Background:** The burdens of psychostimulant use disorders are becoming a worldwide problem. One of the psychostimulants widely consumed in Ethiopia and East African countries is *Catha edulis Forsk* (khat). However, no studies have been conducted on the cognitive effects of khat and its correlation with serum electrolytes. The present study was aimed to evaluate the effects of khat on cognitive functions and its correlation with serum electrolytes.

**Materials and Methods—** A total of 36 adult (7-8 weeks) wild-type male Swiss albino rats weighing between 213 and 229g were used in this study. The rats were received crude khat extract subchronically (kesc) (100 mg/kg, 200 mg/kg and 300 mg/kg b.w), khat juice (khJ 2.5 mL/kg) and 2% tween 80 in distilled water (T80W- v/v, vehicle) and khat extract subacutely (kesa) (300 mg/kg). Spatial learning and memory were measured using Morris water maze model and serum electrolytes were measured using Cobas 6000. The data were analyzed using SPSS version 21.0 and Microsoft Excel.

**Results:** Spatial learning was improved with trials across the groups, while average escape latency (s) and swim path-length (cm) of rats that received kesc 200 mg/kg ( $p<0.001$  and  $p<0.001$ ) and kesc 300 mg/kg ( $p<0.01$  and  $p<0.001$ ) was significantly greater than rats that received the vehicle. However, there was no significant difference in the latency between rats that received kesa 300mg/kg and vehicle ( $p>0.05$ ). Thigmotaxis was significantly higher in rats that received all doses of khat extract ( $p<0.001$ ). The time spent in the target quadrant in rats that received kesc 300 mg/kg was significantly reduced ( $p<0.05$ ). Serum calcium level was inversely correlated with the escape latency ( $R=-0.417$ ,  $p<0.05$ ) in rats that received khat.

**Conclusions:** khat extract and juice administered subchronically, but not subacute administration, impaired learning and memory in rats and was associated with serum calcium reduction. The neuronal basis for such alteration should be investigated.

**Keywords:** khat, Morris water maze, escape latency, time spent in the target quadrant, serum electrolytes

## 1. INTRODUCTION

Substance and psychostimulants use disorders are prevalent and their burdens are getting high throughout the world (1). Not only addiction is attributed to psychostimulants but also cognitive problems (2). Psychostimulants such as cocaine abuse contribute to cognitive impairments (3) and a previous study showed that cognitive impairments are common in subjects with electrolyte imbalance (4).

*Catha edulis*, commonly called khat, is one of the psychostimulants widely consumed in Eastern African countries including Ethiopia (5 & 6). Khat is belonging to the Celastraceae family and is an evergreen shrub (7). Cathinone in khat, an amphetamine-like substance, is the major component responsible for neurobehavioral and neurochemical alterations (7). Regardless of its adverse effect (8 and 9), misperceptions of its learning and memory effects are reflected among students (10).

Though the correlation between the effects of khat on spatial memory and serum electrolytes has not been yet investigated, few studies have been investigated about the effects of khat on cognitive functions (5 & 11). Some studies found that khat reduced academic performance (12 & 13), while others reported that it enhances mental alertness and performance (14 & 15), controversial findings. The present study was, therefore, aimed to evaluate the effects of khat on cognitive functions and its correlation with serum electrolytes in wild-type male Swiss albino rats.

## 2. Materials and methods

### 2.1 Chemicals

Diethyl ether and chloroform (Siga-Aldrich, Germany), Tween 80, and 70 % ethanol purchased from local suppliers in Addis Ababa, Ethiopia was used in this study.

## **2.2 Plant materials collection**

Bundles of fresh khat leaves (9kg) were collected from Aweday, 525 km South-East of Addis Ababa, Ethiopia. The plant specimen was identified, and the voucher number (October 16, 2018, AA002) was given and deposited at the National Herbarium of Ethiopia, Addis Ababa University.

## **2.3 Plant material extraction**

According to the previous studies (16 &17), after the edible parts of the leaves were separated and washed with tap water, the leaves were freeze-dried at -20°C for 2 days. The leaves were crushed using mortar and pestle. Two hundred grams of freeze-dried crushed leaves were put into a conical flask wrapped with aluminum foil and a total of 400 mL of diethyl ether and chloroform (3:1v/v ratio) were added into the flask (18). The mixture was shaken under dark conditions for 48hrs using a rotary shaker (New Brunswick Scientific Co, USA) at 120 rpm and 20°C. Then, filtered initially using cotton gauze followed by grade I Whatman filter paper (Cat No 1001 150). The organic solvents were then removed through evaporation using Rota-vapor under a controlled temperature of 36°C, rotation of 120 rev/min, and 240 Pascal negative pressure. The water in the extract was removed through lyophilization and the dry residue was weighed and stored in a desiccator till used.

The khat juice (khJ) was prepared from 12g/kg body weight (b.w) of fresh leaves. The fresh leaves in 2% tween 80 in distilled water (T80W) were crushed using a blender machine. The juice was then squeezed and filtered using the gauze and grade I Whatman filter paper (Cat No 1001 150). The amount of T80W in distilled water used to extract the given weight of leaves was determined based on the total weight of each rat and standard vehicle volume (2.5 mL/kg b.w).

## **2.4 Animal preparation**

A total of 36 adult wild-type male Swiss albino rats aged between 7-8 weeks weighing between 213 and 229g were used. The rats were purchased from a Laboratory Animal Breeding Section of the Ethiopian Public Health Institution. Three rats per plastic cage under natural light and dark (12:12hrs) cycles at room temperature were housed. Water and standard pellet diet were available *ad libitum* throughout the study period. Rats were weighed twice a week to ensure appropriate dosing. All the studies were conducted under the guidelines for animal research as detailed in the NAP guidelines for Care and Use of Laboratory Animals (19). The study was approved by the Institutional Review Board ethical committee in Addis Ababa University.

## **2.5 Grouping and dosing**

Rats were randomly assigned into six groups (n= 6 /group) and received T80W, khat extract subchronically (kesc) (100 mg/kg, 200 mg/kg and 300 mg/kg), khat juice (khJ 2.5 mL/kg), and khat extract subacutely (kesa) 300 mg/kg. The subchronic groups of rats were received for twelve weeks before the behavioral experiment and during the experiment. However, the subacute group received the extract only during the experiment. Rats that received the T80W (vehicle) were taken as controls. The doses for the extract were selected based on the previous report (20).

## **2.6 Preparation of test substances and volume determination**

Fresh solutions of extract, khJ, and vehicle were prepared every day. The khat extract was dissolved in T80W. The dose of the extract administered in each rat was calculated from the selected doses and the total b.w of each rat. The appropriate standard vehicle volume (2.5 mL/kg b.w) was used to determine how much volume was used to dissolve the calculated dose of khat extract. Each rat in its respective group received a single daily oral administration of vehicle, khat

extract, khJ. The final volume for each rat was 1mL and all substances were administered orally using metal gavage.

## **2.7 Morris Water Maze performance test**

### **2.7.1 Apparatus and experimental procedure**

The water maze consisted of a uniformly blue circular pool (180cm in diameter and 52 cm high) filled to a depth of 25 cm with water ( $24\pm 2^{\circ}\text{C}$ ) (23). The water was heated using an electric heater every morning before the experiment. The maze was divided into North (N), South(S), East (E) and West (W) equal quadrants. The immovable platform (10x24cm) where each rat can escape from the water and external fixed position maze cues for each rat to navigate the hidden platform during the acquisition phase was used.

The previous procedure used by Frick et al. (21) and Kimani et al. (22) was applied. Briefly, one day after habituation, acquisition trials were started. The platform was placed in the middle of the South-East (SE) quadrant. It was 1cm above the water surface on the first day of acquisition trials and then 1 cm below the water surface on the remaining trials. The position of the platform was fixed throughout the acquisition trials. 24hrs after test substances treatment, each rat was placed into the maze facing the wall of the pool at one of the randomly selected starting positions. Different starting positions were used for different trials for each rat. Each rat was allowed to swim for 120s to find the hidden platform. If a rat failed to get the hidden platform within this time limit, the rat was manually guided into the platform and 120s was taken as the escape latency. The rats were allowed to last on the platform for 30 s before being returned into the cage. The acquisition trials were conducted for 5 consecutive days with 4 trials per/day having an intertrial interval of 10 min. The performances of each rat were videotaped by the camera mounted 1 m above the maze to be replayed later into a computer. Escape latency (s), swim path-length (cm),

swim speed (cm/s) and thigmotaxis (s) were measured during each trial and the average value was taken for each acquisition day.

The probe trial was conducted 24hrs after the last acquisition trial. The platform was removed and each rat was allowed to swim for 120 s starting from North-West (NW). Time spent in each quadrant (s), transfer latency (s), swim path-length (cm), and speed (cm/s) in the target quadrant (Tq), and the number of crossovers into the Tq were measured.

## **2.8 Serum electrolyte determination**

At the end of the neurobehavioral study and 24 hrs after the last test substances administration, whole blood was collected from each rat for serum electrolytes assay. The procedure used by Alsalahi *et al.* (23) was applied during serum electrolyte determination. Five milliliters of fasting blood from each rat were collected into plain tubes through cardiac puncture. Then, the tubes were allowed to stand to clot. Following clotting, the tubes were centrifuged immediately with a speed of 6000rpm for 10 minutes to obtain the supernatant. The supernatant was slowly transferred into a new Eppendorf tube for sodium (Na<sup>+</sup>), potassium (K<sup>+</sup>), calcium (Ca<sup>2+</sup>), and chloride (Cl<sup>-</sup>) analysis using an electrolyte machine (Automated electrolyte Analyzer: Cobas- 6000).

## **2.9 Statistical analysis**

SPSS version 21.0 and Microsoft Excel were used during data analysis. The values were expressed as mean ±S.E.M. Differences in mean values between groups were analyzed using one-way ANOVA followed by post hoc analysis. Two ways repeated measures of ANOVA followed by Bonferroni test, t-test, and Pearson's correlation were also used in this study.

### 3. Results

#### 3.1 Escape latency during acquisition trials

The latency was significantly reduced across trials among the groups ( $F_{(1.24, 6.20)} = 45.70, p < 0.001$ ). Treatment and its interaction with trials had also significant effect on the latency ( $F_{(6, 30)} = 14.16, p < 0.001$  and  $F_{(24, 120)} = 5.75, p < 0.001$ , respectively). Bonferroni estimated marginal test didn't show a significant difference in latency between groups (**Figure 1**). However, Tukey's test analysis showed that the average latency in rats that received kesc 200 mg/kg ( $p < 0.001$ ), kesc 300 mg/kg ( $p < 0.01$ ), and khJ 2.5 mL/kg ( $p < 0.05$ ) was significantly higher than in rats that received T80W (Table 1). The latency of rats that received kesa 300 mg/kg was significantly reduced compared with rats that received kesc300 mg/kg ( $15.40 \pm 0.75$  vs  $30.83 \pm 1.54, p < 0.01$ ).

**Figure 1: Effect of khat extract and juice on escape latency during acquisition trials. Each point across the line represents the mean  $\pm$  SEM of escape latency in rats (n= 6 in each group) that received T80W, kesc (100 mg/kg, 200 mg/kg and 300 mg/kg), kesa 300 mg/kg and khJ 2.5 mL/kg. Each group of rats was compared with rats that received T80W. kesc: khat extract subchronic, kesa: khat extract subacute, khJ: khat juice.**

#### 3.2 Swim path-length during acquisition trials

The path-length was significantly reduced with trials among the groups ( $F_{(1.19, 5.94)} = 29.79, p < 0.01$ ). Treatment and its interaction with trials had also a significant effect on the path-length ( $F_{(6, 30)} = 14.67, P < 0.001$  and  $F_{(24, 120)} = 11.32, p < 0.001$ , respectively). The Bonferroni estimated marginal mean analysis indicated that there was a significant change in swim path-length among rats that received khJ 2.5 mL/kg subchronically ( $p < 0.01$ ) and kesa 300 mg/kg ( $p < 0.05$ ) compared with rats that received T80W (**Figure 2**). Rats that received kesa 300 mg/kg ( $p < 0.01$ ), kesc 100 mg/kg ( $p < 0.001$ ), kesc 200 mg/kg ( $p < 0.001$ ), kesc 300 mg/kg ( $p < 0.001$ ) and khJ 2.5 mL/kg ( $p < 0.001$ ) swam significantly more path-length than rats that received T80W (**Table 1**).

**Figure 2: Effect of khat extract and Juice on swim path-length during acquisition trials. Each point across the line represents the mean  $\pm$  SEM of swim path-length in rats (n= 6 / group) that received T80W, kesc (100 mg/kg, 200 mg/kg and 300 mg/kg), kesa (300 mg/kg) and khJ 2.5 mL/kg. kesc: khat extract administered subchronically, kesa: khat extract subacute, AA: ascorbic acid, khJ: khat juice.**



### 3.3 Swimming speed (cm/s) during acquisition trials

Significant change was observed in the swim speed across trials ( $F_{(4, 20)} = 14.63$ ,  $p < 0.001$ ). The treatment and its interaction with trials had also a significant effect on swim speed ( $F_{(2.38, 11.92)} = 23.93$ ,  $p < 0.001$  and  $F_{(3.01, 15.06)} = 4.87$ ,  $P < 0.05$ , respectively). The Bonferroni estimated marginal mean test indicated that there was no significant difference in swim speed between groups (**Figure 3**). However, rats that received kesc 100 mg/kg had significantly greater swim speed than rats that received T80W ( $p < 0.001$ ) and kesc 200 mg/kg ( $p < 0.05$ ). Rats that received kesa 300 mg/kg swam significantly faster than rats that received T80W ( $p < 0.001$ ), and kesc 300 mg/kg ( $p < 0.001$ ).

**Figure 3: Effect of khat extract and juice on swim speed during acquisition trials.** Each point across the line represents the mean  $\pm$  SEM of swimming speed in rats ( $n = 6$  / group) that received T80W, kesc (100 mg/kg, 200 mg/kg and 300 mg/kg), kesa (300 mg/kg) and khJ 2.5 mL/kg. Each group of rats was compared with rats that received T80W. kesc: khat extract subchronic, kesa: khat extract subacute, khJ: khat juice.

### 3.4 Thigmotaxis(s) during acquisition trials

The time spent at the periphery of the maze was significantly reduced across trials ( $F_{(4, 20)} = 55.30$ ,  $P < 0.001$ ). The treatment and its interaction with trials had also a significant effect on thigmotaxis ( $F_{(1.98, 9.89)} = 23.96$ ,  $p < 0.001$  and  $F_{(2.49, 12.45)} = 5.06$ ,  $p < 0.05$ , respectively). The Bonferroni estimated marginal mean test showed that rats received kesc 100 mg/kg ( $p < 0.01$ ), kesc 200 mg/kg ( $p < 0.01$ ) and kesc 300 mg/kg ( $p < 0.01$ ) had significantly higher thigmotaxis than rats that received T80W (**Figure 4**).

**Figure 4: Effect of khat extract and juice on thigmotaxis during acquisition trials.** Each point across the line represents the mean  $\pm$  SEM of thigmotaxis in rats ( $n = 6$  / group) that received T80W, AA 200 mg/kg, kesc (100 mg/kg, 200 mg/kg and 300 mg/kg), kesa (300 mg/kg) and khJ 2.5 mL/kg. kesc: khat extract administered subchronically, kesa: khat extract subacute, AA: ascorbic acid, khJ: khat juice.

Rats that received kesc 100 mg/kg ( $p < 0.001$ ), kesc 200 mg/kg ( $p < 0.001$ ), kesc 300 mg/kg ( $p < 0.001$ ) and khJ 2.5 mL/kg ( $p < 0.001$ ) had also significantly greater thigmotaxis than rats that received T80W (**Table 1**). However, increased in thigmotaxis among these groups, except rats that received khJ 2.5 mg/kg ( $R = .937$ ,  $p < 0.01$ ), of rats was not significantly correlated with the escape

latency ( $R = .677, p > 0.05$ ;  $R = .750, p > 0.05$  and  $R = .752, p > 0.05$ , respectively, **Figure 5**). The thigmotaxis in rats that received kesa 300mg/kg was significantly less than in rats that received kesc 300 mg/kg ( $p < 0.001$ ) and vehicle ( $p < 0.001$ ).

**Figure 5: Correlation between average escape latency and thigmotaxis of rats (n= 6 / group) that received kesc 100 mg/kg (a), kesc 200 mg/kg (b), kesc 300 mg/kg (c) and KhJ 2.5 mL/kg (d). R: correlation coefficient.**

**Table 1: Effects of Khat on Average Escape Latency, Swim path-length, Swimming Speed and Thigmotaxis in Rats**

| Group          | Parameters                   |                                 |                             |                            |
|----------------|------------------------------|---------------------------------|-----------------------------|----------------------------|
|                | Escape latency(s)<br>(M±SEM) | Swim Path length(cm)<br>(M±SEM) | Swim speed(cm/s)<br>(M±SEM) | Thigmotaxis (s)<br>(M±SEM) |
| T80W           | 19.00±2.31                   | 416.67±59.37                    | 21.83±1.79                  | 9.67±1.17                  |
| kesa 300 mg/kg | 15.17±.75                    | 703.17**±38.65                  | 46.48***±1.89               | 6.50***±34                 |
| kesc 100 mg/kg | 24.50±1.09                   | 801.33***±41.23                 | 32.97***±1.99               | 18.83***±.79               |
| kesc 200 mg/kg | 34.83***±2.46                | 841.67***±63.61                 | 24.19±1.03                  | 23.83***±2.01              |
| kesc 300 mg/kg | 30.83**±1.54                 | 822.50***±35.48                 | 26.78±.72                   | 21.67***±1.20              |
| khJ 2.5 mL/kg  | 28.83*±2.63                  | 775.17***±58.97                 | 27.13±1.03                  | 20.50***±1.57              |

Each point represents the mean ± SEM of escape latency, swim path-length, swim speed and thigmotaxis in rats (n= 6/ group) that received T80W, kesc (100 mg/kg, 200 mg/kg and 300 mg/kg), kesa (300 mg/kg) and khJ 2.5 mL/kg. \*\*\* $p < 0.001$ , \*\* $p < 0.01$  and \* $p < 0.05$  when each group of rats was compared with rats that received T80W. kesc: khat extract subchronic, kesa: khat extract subacute, khJ: khat juice.

### 3.5 Time spent in the target quadrant during probe trials

The paired t-test indicated that rats that received kesc 300 mg/kg had significantly less time spent in the target quadrant (Tqt) than in the left adjacent ( $t_{(5)} = -3.75, p < 0.05$ ) and opposite quadrant ( $t_{(5)} = -2.598, p < 0.05$ ). However, the rats that received kesa 300 mg/kg had significantly higher Tqt than in left adjacent ( $t_{(5)} = 15.62, P < 0.001$ ), right adjacent ( $t_{(5)} = 15.09, p < 0.001$ ) and opposite ( $t_{(5)} = 12.72, p < 0.001$ ). Rats that received T80W had significantly higher Tqt than in the opposite quadrant ( $t_{(5)} = 2.68, p < 0.05$ ). The Tqt by rats that received khJ 2.5 mL/kg was significantly less than in the left adjacent quadrant ( $t_{(5)} = -3.75, p < 0.05$ , **Table 2**).

**Table 2: Effects of Khat on Time Spent(s) in Target and other Quadrants During the Probe Trials**

| Group          | Time spent(s) in different quadrants |             |              |              | Probe trial conducted                  |
|----------------|--------------------------------------|-------------|--------------|--------------|----------------------------------------|
|                | SE(Tq)                               | SW          | NE           | NW           |                                        |
| T80W           | 31.33±2.16                           | 28.12±1.03  | 25.11±1.42   | 25.03*±.55   | 24hrs after the last acquisition trial |
| kesa 300 mg/kg | 36.50±.89                            | 26.00**±.78 | 24.17***±.55 | 23.33***±.72 |                                        |
| kesc 100 mg/kg | 27.83±1.01                           | 28.77±.88   | 26.96±.86    | 26.61±.53    |                                        |
| kesc 200 mg/kg | 30.83±3.31                           | 27.77±1.61  | 23.34±1.46   | 26.06±1.35   |                                        |
| kesc 300 mg/kg | 24.83±.98                            | 29.28*±.56  | 28.55±.87    | 27.34*±.15   |                                        |
| khJ 2.5mL      | 25.00±.97                            | 29.52*±.59  | 27.99±.76    | 27.52±1.21   |                                        |

Each point represents mean ± SEM of time spent (s) in different quadrants in rats (n=6 in each group) that received T80W, kesa (300 mg/kg), kesc (100 mg/kg, 200 mg/kg and 300 mg/kg) and KhJ 2.5 mL/kg. \*\*\*p <0.001, \*\*p < 0.01 and \*p < 0.05 when the time spent in the Tq (SE) was compared with the time spent in left adjacent (SW), right adjacent (NE) and opposite (NW) quadrants. kesc: khat extract subchronic, kesa: khat extract subacute, khJ: khat juice and Tq: target quadrant.

Independent t-test also revealed that the Tqt (s) in rats that received kesc 300 mg/kg was significantly reduced compared with rats that received T80W (, p<0.05, **Table 3**).

**Table 3: Effects of Khat on Time Spent (s) in Tq During Probe Trials**

| Group  | kesa300 mg/kg | kesc100 mg/kg | kesc200 mg/kg | kesc 300 mg/kg | khJ 2.5 mL/kg |
|--------|---------------|---------------|---------------|----------------|---------------|
| Tqt(s) | 36.5±0.89     | 27.50±1.06    | 26.17±2.24    | 23.83*±1.22    | 25.00±.97     |
| T80W   |               |               | 31.33±2.16    |                |               |
| Tqt(s) | 36.5±0.89     | 27.50±1.06    | 26.17±2.24    | 23.83**±1.22   | 25.00±.97     |

Each point represents the mean ± SEM of time spent (s) in different quadrants in rats (n=6 in each group) that received T80W, kesa (300 mg/kg), kesc (100 mg/kg, 200 mg/kg and 300 mg/kg) and KhJ 2.5 mL/kg. \*\*\*p <0.001, \*\*p < 0.01 and \*p < 0.05 when Tqt (SE) in each group was compared with rats that received T80W. kesc: khat extract subchronic, kesa: khat extract subacute, khJ: khat juice. Tqt(s): time spent (s) in the target quadrant.

### 3.6 Transfer latency into the target quadrant during probe trials

There was a significant difference in the first target site crossover among the groups ( $F_{(6, 35)} = 35.23, p < 0.00$ ). The post hoc Tukey's test analysis indicated that the time was taken by rats that received kesc 100 mg/kg, kesc 200 mg/kg, kesc 300 mg and khJ 2.5mL before they entered into the target quadrant (Tq) was significantly greater compared to the control ( $7.33±0.84$  vs  $3.50±0.50, p < 0.05$ ;  $8.67±0.56$  vs  $3.50±0.50, p < 0.01$ ;  $9.50±0.56$  vs  $3.50±0.50, p < 0.001$  and  $16.17±1.11, p < 0.001$ , respectively) in a dose-dependent manner (**Figure 6**).

**Figure 6: Latency to the Tq during the probe trial.** Each bar represents the mean  $\pm$  SEM of the transfer latency to the Tq in rats (n=6 in each group) that received T80W, kesa (100 mg/kg, 200 mg/kg, 300 mg/kg), kesc (300 mg/kg) and khJ 2.5 mL/kg. \*\*\*P < 0.001, \*\*P < 0.01 and \*P < 0.05 when each group of rats was compared with rats that received T80W. kesc: khat extract subchronic, kesa: khat extract subacute, khJ: khat juice.

### 3.7 Effects of khat on serum electrolytes

Analysis of one-way ANOVA indicated that significant differences were observed in the concentrations of Na<sup>+</sup> (F<sub>(5,30)</sub> = 12.17, P<0.001), K<sup>+</sup> (F<sub>(5,30)</sub> = 2.99, p < 0.05), Ca<sup>++</sup> (F<sub>(5,30)</sub> = 3.32, p<0.05) and as well as Na<sup>+</sup> / K<sup>+</sup> ratio (F<sub>(5,30)</sub> = 5.54, p<0.01) whereas there was no significant difference in Cl<sup>-</sup> (F<sub>(5,30)</sub> = 0.78, p>0.05) concentration. The post hoc analysis revealed that the mean serum Na<sup>+</sup> concentrations in rats that received kesc 100 mg/kg (p<0.01), kesc 200 mg/kg (p<0.001), kesc 300 mg/kg (p<0.001) and khJ 2.5 mL/kg (p<0.001) were significantly less than in rats that received T80W (table 4). Rats that received kesc 200 mg/ kg (p<0.05) and 300 mg/kg (P<0.05) had significantly reduced Ca<sup>++</sup> concentration. The concentration of K<sup>+</sup> in rats that received kesc 300 mg/kg was insignificantly increased compared with rats that received T80W (**Table 4**) and significantly higher than rats that received kesc 100 mg/kg (p<0.05) while Na<sup>+</sup>/K<sup>+</sup> ratio was significantly reduced (p<0.001).

**Table 4: Effects of Khat on Serum Electrolytes**

| Group          | Electrolytes (mmol/L), M $\pm$ SEM |                 |                  |                   |                                 |
|----------------|------------------------------------|-----------------|------------------|-------------------|---------------------------------|
|                | Na <sup>+</sup>                    | K <sup>+</sup>  | Ca <sup>++</sup> | Cl <sup>-</sup>   | Na <sup>+</sup> /K <sup>+</sup> |
| T80W           | 145.67 $\pm$ 1.31                  | 5.88 $\pm$ .44  | 2.78 $\pm$ .23   | 101.59 $\pm$ .77  | 25.55 $\pm$ 2.06                |
| kesc 100 mg/kg | 140.50*** $\pm$ .99                | 4.28 $\pm$ .45  | 2.37 $\pm$ .04   | 102.43 $\pm$ .95  | 34.29 $\pm$ 2.89                |
| kesc 200 mg/kg | 136.67*** $\pm$ .92                | 6.74 $\pm$ 1.43 | 2.08* $\pm$ .19  | 99.95 $\pm$ .71   | 23.28 $\pm$ 2.94                |
| kesc 300 mg/kg | 137.17*** $\pm$ .79                | 9.14 $\pm$ 1.22 | 2.00* $\pm$ .19  | 100.26 $\pm$ .68  | 16.44 $\pm$ 2.26                |
| khJ 2.5 mL/kg  | 138.67*** $\pm$ .61                | 6.95 $\pm$ .51  | 2.43 $\pm$ .05   | 100.76 $\pm$ 1.22 | 20.49 $\pm$ 1.47                |

Each point represents the mean  $\pm$  SEM of electrolytes in rats (n= 6/group) that received T80W, AA 200 mg/kg, khat extract subchronically (kesc) (100 mg/kg, 200 mg/kg and 300 mg/kg) and khJ 2.5 mL/kg. \*\*\*P < 0.001, \*\*P < 0.01 and \*P < 0.05 when each group of rats was compared with rats that received T80W. T80W: tween 80 in distilled water, kesc: khat extract subchronic and khJ: khat juice.

Although a significant correlation between the escape latency (s) and mean serum  $\text{Na}^+$  ( $R = -0.383$ ,  $p > 0.05$ ) and  $\text{Na}^+/\text{K}^+$  ratio ( $R = -0.365$ ,  $p > 0.05$ ) level was not observed it was inversely correlated with serum  $\text{Ca}^{++}$  level in rats that received khat (**Figure 7a and b**). However, there was no significant correlation between the escape latency and  $\text{Ca}^{++}$  ( $R = -0.322$ ,  $p > 0.05$ ) in rats that received T80W observed (**Figure 7**).

**Figure 7: Correlation between escape latency and serum  $\text{Na}^+$  level (a) and  $\text{Ca}^{2+}$  (b) in rats that received khat extract and juice. R: correlation coefficient.**

## 4. Discussion

### 4.1 Escape latency during acquisition trials

Though spatial learning was improved over the repeated trials across the groups, average escape latency in rats that received the middle and higher doses of khat extract and khat juice subchronically was greater than in rats that received the vehicle. This indicates that crude khat extract and juice affect learning negatively. Similarly, a study conducted by Kimani and Nyongesa (16) indicated that the middle (120mg/kg b.w) and higher (360mg/kg b.w) doses of khat extract impaired learning in mice. However, the study conducted by Mohammed *et al.* (6) indicated that latency was increased significantly across trials in rats that received the lower dose of the extract. The difference in this finding could be attributed to the test protocol and animal model used to evaluate the effect of khat on spatial learning. In our study, khat extract and juice were administered before and during behavioral experiments. However, it was only before the experiment in the study conducted by Mohammed *et al.* (6).

Latency in rats that received khat extract subacutely was significantly reduced compared with rats that received the same dose administered subchronically. However, a significant difference was

not observed in the latency when this parameter in the rat that received the extract subacutely compared with rats that received the vehicle. This outcome revealed that subacute administration of khat extract didn't affect spatial learning. Yet, a previous study indicated that impairment in spatial learning was more far-reaching in rats administered with amphetamine subacutely compared with control (24).

#### **4.2 Swim path-length and speed during acquisition trials**

The swim path-length was reduced across trials and it was more pronounced in rats that received khat extract subacutely showing that subacute administration of khat extract doesn't affect learning in rats. The average swim path length moved by the rats that received all doses of khat extract and juice subchronically was significantly greater than the rats that received the vehicle. Previous studies indicated that rats that received cocaine (3) and amphetamine (24 & 25) swam longer path-length compared with control before rats escaped into the hidden platform. Tukey's test also showed that rats that received the lower dose of extract subchronically had a significantly greater speed than rats that received the middle dose of the extract and vehicle that could be attributed to khat-induced neurochemical alteration. The previous study indicated that the lower and higher doses of amphetamine induce a differential response on the level of brain neurotransmitters (26) and its locomotor activity was maximum at the lower dose (27).

Rats that received the higher dose of extract subacutely had significant greater swim speed than rats that received the same dose of the extract administered subchronically. This indicated that the locomotor effect of the khat was stronger at a lower dose and administered for a short time. A similar finding was reported by Kimani and Nyongesa (16) in that the average swim speed was significantly increased in mice that received the lower dose compared with mice that received the higher and middle doses of extract and vehicle.

### **4.3 Thigmotaxis during acquisition trials**

In this study, thigmotaxis in rats that received all doses of khat extract and khat juice administered subchronically was significantly greater than in rats that received vehicle and khat extract subacutely. Yet, elevated stress and anxiety increase thigmotaxis (3) and stress affects learning and memory (28), a significant correlation between thigmotaxis and escape latency was not observed in rats that received khat extract in this study. Though stress affects either the short term or long-term memory based on the source of stress in the brain, duration and intensity of the stress (29 & 30), like our study, Mendez *et al.* (3) indicated that though thigmotaxis was significantly higher in rats administered with cocaine, there was no significant correlation between latency and thigmotaxis.

However, a significant correlation was observed between thigmotaxis and latency in rats that received khat juice. The differential effects of khat on thigmotaxis and the escape latency could be attributed to the effect of the extraction processes on the phytochemical constituents in khat (31). These findings showed that khat extract administered in rats for a longer period had an anxiogenic effect, and thigmotaxis in rats that received khat juice had effects on time taking to find the hidden platform during the acquisition trials in rats that received khat juice. However, subacute administration of khat extract didn't contribute to stress, thigmotaxis and reduction of learning and memory. Similarly, a previous study reported that acute administration of khat in an animal model reduced stress levels and showed antidepressant-like activities (18).

### **4.4 Time spent in the target quadrant during probe trials**

Rats administered with a higher dose of khat extract and khat juice subchronically had less time spent in the target quadrant than the time spent in other quadrants. However, rats that received the same dose of khat extract subacutely spent more time in the target quadrant. These findings

revealed that spatial memory was impaired at the higher dose and prolonged administration of crude khat extract and juice. However, a previous study indicated that the higher dose (360mg/kg b.w) improved memory but it was impaired by the lower (40mg/kg b.w) and middle (120mg/kg b.w) doses (16) of khat extract. The disagreement between these findings could be attributed to the extraction process, route of administration, type of animal model, probe trial time and time of behavioral test conducted after khat administration. A study conducted by Mohammed *et al.* (6) showed that mice that received khat extract subacutely had significantly higher time spent in the target quadrant. The higher dose of khat extract administered subchronically also reduced the time spent in the target quadrant compared with rats administered with the vehicle.

#### **4.5 Transfer latency into the target quadrant during the probe trial**

In this study, the time taken before the initial entry into the target quadrant by rats administered with all doses of khat extract and juice subchronically was significantly greater than in rats administered with the vehicle. This indicated that rats administered with khat took more time before they entered into the target quadrant, their memory was affected negatively.

In conclusion, impairment in the Morris water maze task performance in this study could be attributed to an alteration in brain structures, brain glucose metabolism, sleep, serum electrolytes, antioxidants, oxidative stress, hemoglobin level and neurotransmitters signaling pathways. A previous study indicated that amphetamine destroyed hippocampal cells, disrupted the blood-brain barrier and increased reactive oxygen species induced neurotoxicity on brain areas involved in Morris water maze performance (32). Other studies showed that khat impaired mood (33), sleep (34), working memory and inhibitory control response (11). Synthetic cathinone arrested hippocampal cell growth (35) and khat extract destroyed the prefrontal cortex (36). The study



conducted by Thanos *et al.* (37) showed that amphetamine enlarged brain striatal volumes and reduced glucose metabolism.

#### **4.6 Effects of khat on serum electrolytes and their correlation with learning**

In this study, all doses of khat extract and juice reduced serum sodium level significantly compared to vehicle. A similar finding was observed by Mwanikiet *al.* (38). Methanolic khat extract was administered for six weeks in the previous study, while diethyl ether and chloroform khat extract was administered for twelve weeks in our study. Thus, the solvent of extraction and duration of administration could be some of the reasons for these different findings. Amphetamine, cathinone in khat like substance, also reduced the serum sodium level (39 & 40).

Calcium was also significantly reduced in rats that received the middle and higher doses of khat extract. A similar result was also shown by Mwanikiet *al.* (38). Reduced calcium concentration was reported in subjects with depression (41) and depression was more common subjects administered with khat (10 & 42). However, another study indicated that the serum calcium level was significantly increased among normal subjects and diabetic patients who chewed khat (43).

In this study, a significant inverse correlation between Morris water maze escape latency and calcium was observed in rats that received khat extract, indicating that the less the serum calcium level was the higher the Morris water maze escape latency that signifies reduction in learning and memory. This finding showed spatial memory deficits could be attributed to the serum calcium level effect of khat extract.

On the other hand, depression is associated with the serum calcium level (41), and anxiety showed an effect on memory (44 & 45). Although a significant correlation between serum sodium and escape latency was not observed in our study, previous reports showed that reduced serum sodium

level contributed to cerebral edema and cognitive problems (4 & 46). Studies also showed that blood pressure was affected by serum electrolytes imbalance (47) and other studies revealed that the presence of an association between hypertension and cognitive function (48 &49).

In conclusion, khat extract at the higher dose and prolonged administration impaired learning and memory Morris water maze task performance. However, khat extract administered for a short period couldn't affect spatial learning and memory. The swim speed was maximum at the lower dose of the extract and administered for a short period. Effects of khat on neurochemical, structural, molecular, and neurotransmitter signaling pathways for neurobehavioral findings observed in this study remain to be established.

## **5. Acknowledgment**

This research was supported by Addis Ababa University and the Department of Physiology. We would like to express our appreciation to Dr. Nigusie Deyessa for his support during statistical analysis. We are also indebted to Demere Bekilla and other staff in the Department of clinical chemistry, Ethiopian public health institute for their assistance during electrolyte analysis.

## 6. References

1. Whiteford H, A Ferrari, L Degenhardt. Global Burden of Disease Studies: Implications for Mental and Substance Use Disorders. *Health AFF*. 2016; **35**(6):1114-1120.
2. Wood SC and Anagnostaras SG. Memory and psychostimulants: Modulation of Pavlovian fear conditioning by amphetamine. *Psychopharmacology (Berl)*. 2009; 202(1-3): 197–206.
3. Mendez IA, Montgomery KS, Large CL, Simon NW, Bizon JL, and Setlow B. Long-term effects of prior cocaine exposure on Morris water maze performance. *Neurobiol Learn Mem*. 2008; 89(2): 185–191.
4. Fujisawa H, Sugimura Y, Takagi H, Mizoguchi H, Takeuchi H, Izumida H, et al. Chronic Hyponatremia Causes Neurologic and Psychologic Impairments. *J Am Soc Nephrol*. 2016; 27: 766–780. doi: 10.1681/ASN.2014121196.
5. Ageely HMA. Health and socio-economic hazards associated with khat consumption. *J Family community Med*. 2008; 15(1):3-11
6. Mohammed F, Gerbi A, Tefera A, Seyoum G, Nedi T and Engidawork E. Subchronic Crude Khat (*Catha edulis* F.) Extract Administration Produces Short-term Memory Impairment in Behavioral Tasks without Morphological Toxicity to the Dentate Gyrus in Mice. *Ethiopian pharmaceutical journal*. 2014; 30: 77-94.
7. Kiunga JK, Lukhoba CW, Dossaji SF and Yenesew A. A survey of traditional medicinal uses of *Catha edulis* (Celastraceae) in Meru and Embu counties of Kenya. *International Journal of Ethnobiology & Ethnomedicine*. 2016; 3(1):1-12.
8. Awell Y, Yerra R, Tadele E, Getu K, Dagim A, Hailekiros G, et al. Socio-Economic and Health Effects of Khat Chewing in Mekelle, Tigray Region, Ethiopia. *IJPPR.Human journal*. 2016; 8 (1):11-12.
9. Al-Habori M. The potential adverse effects of habitual use of *Catha edulis* (khat). *Expert Opin Drug Saf*. 2005; 4(6):1145-54

10. Gebrehanna E, Berhane Y and Worku A. Khat chewing among Ethiopian University Students- a growing concern. BMC Public Health. 2014; 14:1-7.
11. Colzato LS, Ruiz MJ, van den Wildenberg WPM, Hommel B. Khat Use Is Associated with Impaired Working Memory and Cognitive Flexibility. PloS ONE .2011; doi: 10.1371/journal.pone.0020602.
12. Alfadly SO, Batarfi AM and Veetil PK. Catha edulis deteriorates spatial working memory in rats but spares reference memory. Indian J of Physiol Pharmacol.2014;58(3):239-249.
13. Kassa A, Loha E, Esaiyas A. Prevalence of khat chewing and its effect on academic performance in Sidama zone, Southern Ethiopia. Afri Health Sci. 2017; 17(1): 175-185
14. Kalix P. Pharmacological properties of stimulant khat. Pharmacology and therapeutics.1990; 48:397-416.
15. Cox G & Rampe H. Adverse effects of khat: a review. Advances in Psychiatric Treatment.2003; 9: 456–463.
16. Kimani ST and Nyongesa A. Effects of single daily khat (Catha edulis) extract on spatial learning and memory in CBA mice. Behavioral Brain Research.2008; 195: 192–197.
17. Atlabachew M, Chandravanshi BS, Redi-Abshiro M, Torto N, Chigome S and Pule Bellah O. Evaluation of the effect of various drying techniques on the composition of the psychoactive phenylpropylamino alkaloids of Khat (Catha edulis forsk) chewing leaves. Bull. Chem. Soc. Ethiop.2013; 27(3): 347-358. ISSN 1011-3924.
18. Alfaifi H, Abdelwahab SI, Mohan S, Mohamed M, Elhassan T, Shaala Lamiaa A, et al. *Catha edulis frosk* (Khat): Evaluation of its antidepressant-like activity. Phcog Mag. 2017; 13: 354-8.)
19. National academies press. Guide for the care and use of laboratory animals, 2010; 8th edition.
20. Shewamene Z and Engidawork E. Subacute administration of crude Khat (Catha edulis F.) extract induce mild to moderate nephrotoxicity in rats. BMC Complementary and Alternative Medicine. 2014; 14:66: doi: 10.1186/1472-6882-14-66.
21. Frick KM, Stillner ET and Berger-Sweeney J. Mice are not little rats: species differences in a one-day water maze task. NEUROREPORT. 2000; 11(16):3461-65.
22. Kimani ST, Patel NB and Kioy PG. Memory deficits associated with khat (Catha edulis) use in rodents. Metab Brain Dis. 2015; DOI 10.1007/s11011-015-9738-1.
23. Alsalahi A, Abdulla MA, Al-Mamary M, Noordin MI, Alabsi AM, Shwter A, et al. Toxicological Features of Catha edulis (Khat) on Livers and Kidneys of Male and Female Sprague-Dawley Rats: A Subchronic Study. Evidence-Based Complementary and Alternative Medicine.2012; <http://dx.doi.org/10.1155/2012/829401>.
24. Mirzaei F, Soleimani S, Shahidi S, Bakhtiar M, Shariati Hesam, Mehdizadeh Mehdi, et al. Chronic and Sub-acute Effects of 3,4-methylenedioxymethamphetamine (MDMA) on Spatial Memory and Passive Avoidance Learning in Wistar Rats. Anatomical science. 2013; 10(4):24-28.

25. Macuchova E, Nohejlova-deykun K and Slamberova R. Effect of Methamphetamine on Cognitive Functions of Adult Female Rats Prenatally Exposed to the Same Drug. *Physiol. Res.* 2013; 62(1):89-98
26. Leonard BE and Shallice SA. Neurochemical effects of amphetamine, methylamphetamine and p-bromomethylamphetamine in the rat. *Br. J. Pharmac.* 1971; 41: 198-212.
27. Yatesa JW, Meija JTA, Sullivana JR, Richtandb NM and Yua L. Bimodal effect of amphetamine on motor behaviors in C57BL/6 mice. *Neurosci Lett.* 2007; 427(1): 66–70.
28. Abidin I, Yargiçoglu P, Gümüslü S, Aydın S, Sahin OO. Effect of chronic restraint stress on spatial learning and memory: relation to oxidant stress. *Intern. J. Neuroscience.* 2004; 114:683–699.
29. Henckens M, Hermans EJ, Zhenwei Pu, Marian Joeis M and Ferná'ndez GN. Stressed Memories: How Acute Stress Affects Memory Formation in Humans. *The Journal of Neuroscience*, 2009; 29(32):10111–10119.
30. Luethi M, Meier B and Sand C. Stress effects on working memory, explicit memory, and implicit memory for neutral and emotional stimuli in healthy men. *Frontiers in Behavioral Neuroscience.* 2009; 2(5): 1-9.
31. Thouri A, Chahdoura H, Arem AE, Hichri AO, Hassin RB and Achour L. Effect of solvents extraction on phytochemical components and biological activities of Tunisian date seeds (var. Korkobbi and Arechti). *BMC Complementary and Alternative Medicine.* 2017; 17:1-10.
32. Ljomone Omamuyovwi M, Nwoha Polycarp U, Olaibi Olayemi K, Obi Augustine U and Alese Magaret O. Effects of methamphetamine on the hippocampus of rats: Behavioral and morphological approach. *Journal of Neuroscience and Behavioral Health*, 2011; 3(8):107-112.
33. Hassan NA, Gunaid AA, El-Khally FM, Murray-Lyon IM. The effect of chewing Khat leaves on human mood. *Article in Saudi medical journal.* 2002; 23 (7): 850-853.
34. Manzar MD, Salahuddin M, Sony P, Maru TT, Pandi-Perumal SR, Moscovitch A , et al. Sleep disturbances and memory impairment among pregnant women consuming khat: An under-recognized problem. *Ann Thorac Med.* 2018; 12:247-51
35. Siedlecka-Kroplewska K, Szczerba A, Lipinska A, Slebioda T and Kmiec Z. 3-fluoromethcathinone inhibits growth and induces cell cycle arrest in ht22 mouse hippocampal cell. *Journal of physiology and pharmacology.* 2014; 65(2):241-46.
36. Isaac E, Edmund BEM, Godfrey M, Elna O, Monima LA, James A. Khat distorts the prefrontal cortex histology and function of adult wistar rats. *Anatomy Journal of Africa.* 2018; 7(1):1121 – 31.
37. Thanos PK, Kim R, Delis F, Ananth M, Chachati G, Rocco I MJ, et al. Chronic Methamphetamine Effects on Brain Structure and Function in Rats. *PLOS ONE.* 2016; 11(6):1-18.
38. Mwaniki DM, Lagat KJ, Ndiema M, Chemwolo LK, Nyariki MJ, Opiyo WO, et al. Effects of catha edulis' leaf extract on blood chemistry and Kidney tissues in small east African male goats from rift Valley province of Kenya. *East African Medical Journal.* 2014; 9(6):1-8

39. Moritz ML, Kalantar-Zadeh K and Ayus JC. Ecstasy-associated hyponatremia: why are women at risk? *Nephrol Dial Transplant*. 2013; 28: 2206–2209.
40. Bora F, Yılmaz F and Bora T. Ecstasy (MDMA) and its effects on kidneys and their treatment: a review. *Iran J Basic Med Sci* 2016; 19:1151-58.
41. Bae Y-J and SKim S-K. Low dietary calcium is associated with self-rated depression in middle-aged Korean women. *Nutr Res Pract*.2012; 6(6):527-533
42. Safhi MM, Alam MF, Hussain S, Hakeem SMA, Khuwaja G, Jubran Khardali IA, et al. Cathinone, an active principle of *Catha edulis*, accelerates oxidative stress in the limbic area of Swiss albino mice. *J Ethnopharmacol*. 2014; 156:102-6. Doi: 10.1016/j.jep.2014.08.004.
43. El-Sayed MK and Amin H. Effect of *Catha edulis* on insulin, resistin and cortisol levels in type-2 diabetics and nondiabetics. *American Journal of Biochemistry and Biotechnology*, 2012, 8 (3), 157-163. doi:10.3844/ajbbsp.2012.157.163.
44. Kizilbash AH, Vanderploeg R and Curtiss G. The Effects of Depression and Anxiety on Memory Performance. *Archives of Clinical Neuropsychology*. 2002; 17(1):57-67. DOI: 10.1016/S0887-6177(00)00101-3.
45. Bolton S and Robinson OJ. The impact of the threat of shock-induced anxiety on memory encoding and retrieval. *Learning and memory*. 2017; 24(10):532-542. Doi: 10.1101/Im.045187.117.
46. Miller M. Hyponatremia and arginine vasopressin dysregulation: mechanisms, clinical consequences, and management. *J Am Geriatr Soc*. 2006; 54(2):345-53.
47. Perez V and Chang ET. Sodium-to-Potassium Ratio and Blood Pressure, Hypertension, and Related Factor. *Adv Nutr* 2014; 5:712–741
48. Muela HCS, Costa-Hong VA, Yasuda MS, Moraes NC, Memória CM, Machado MF, et al. Hypertension Severity Is Associated With Impaired Cognitive Performance. *J Am Heart Assoc*. 2017; 6(1): 1-10. DOI: 10.1161/JAHA.116.004579.
49. Fitri FI and Rambe AS. Correlation between hypertension and cognitive function in elderly. *Earth and Environmental Science*.2018; 25: 1-7. Doi: 10.1088/1755-1315/125/1/012177.

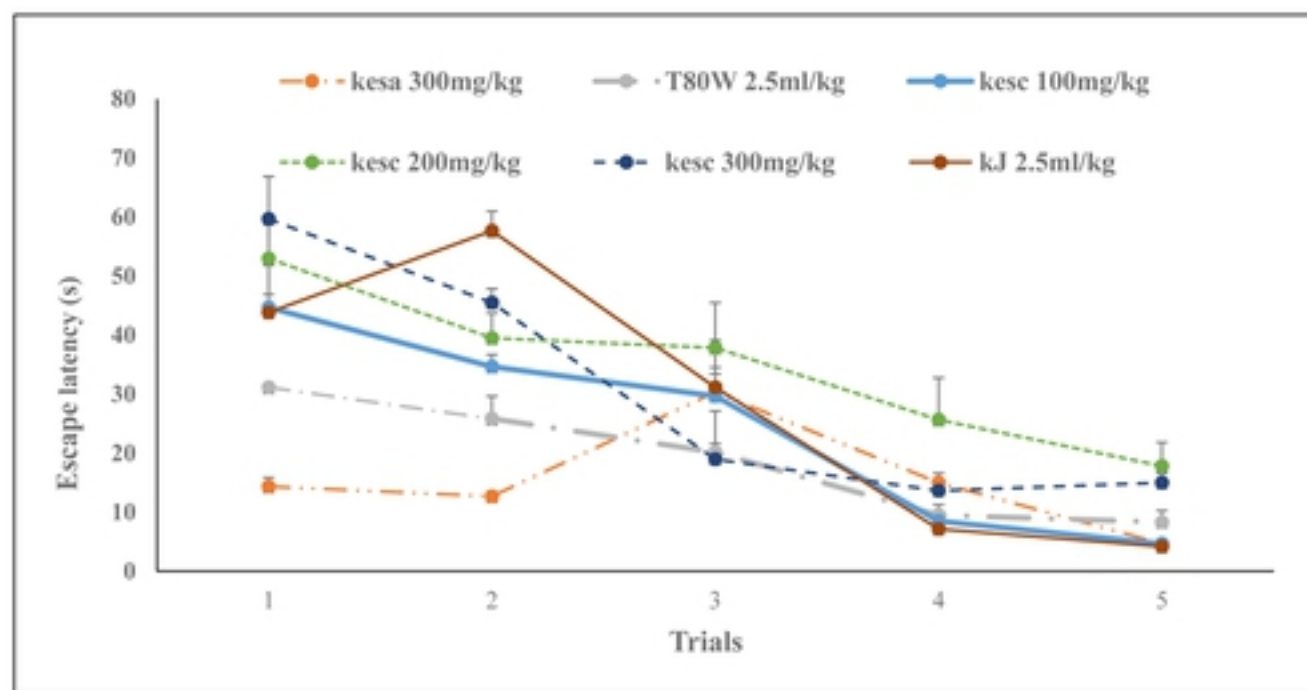

Figure

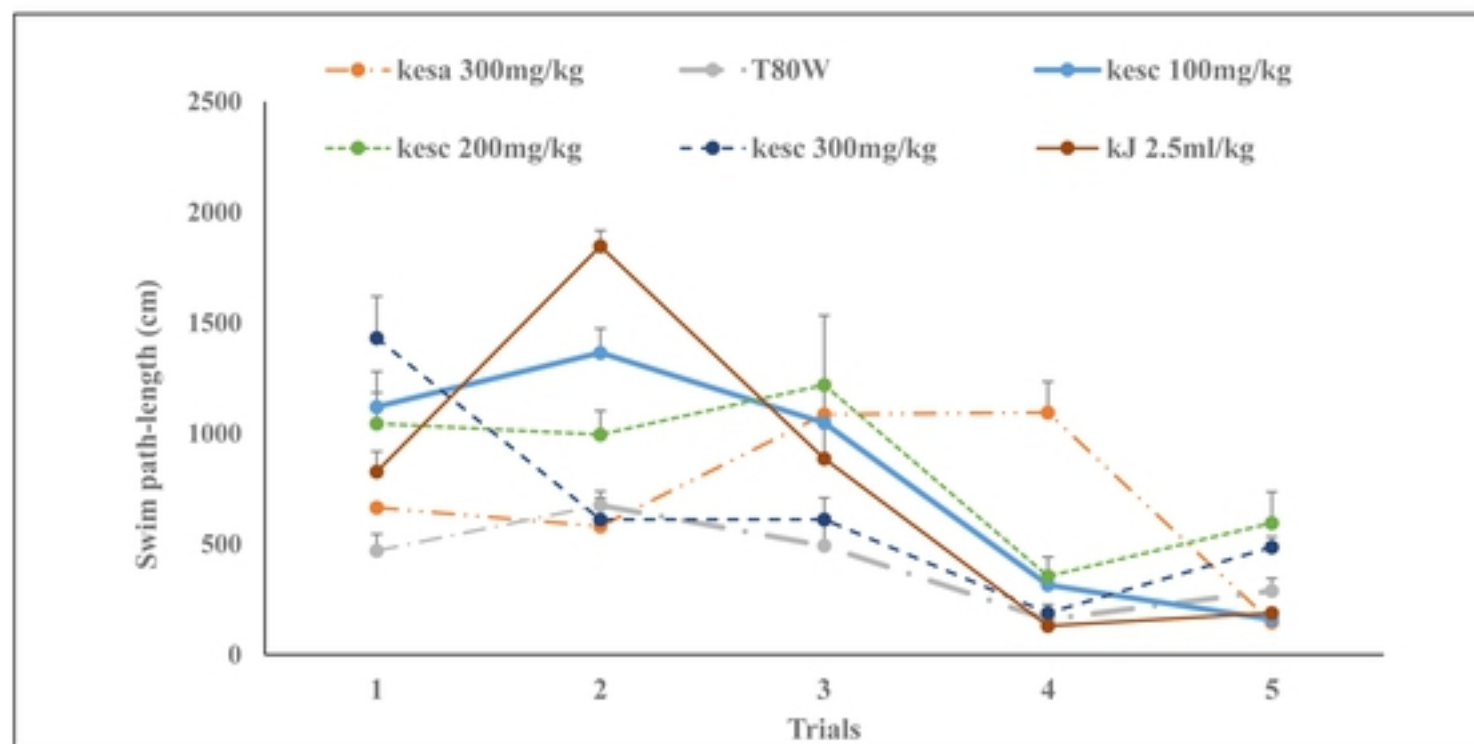

Figure



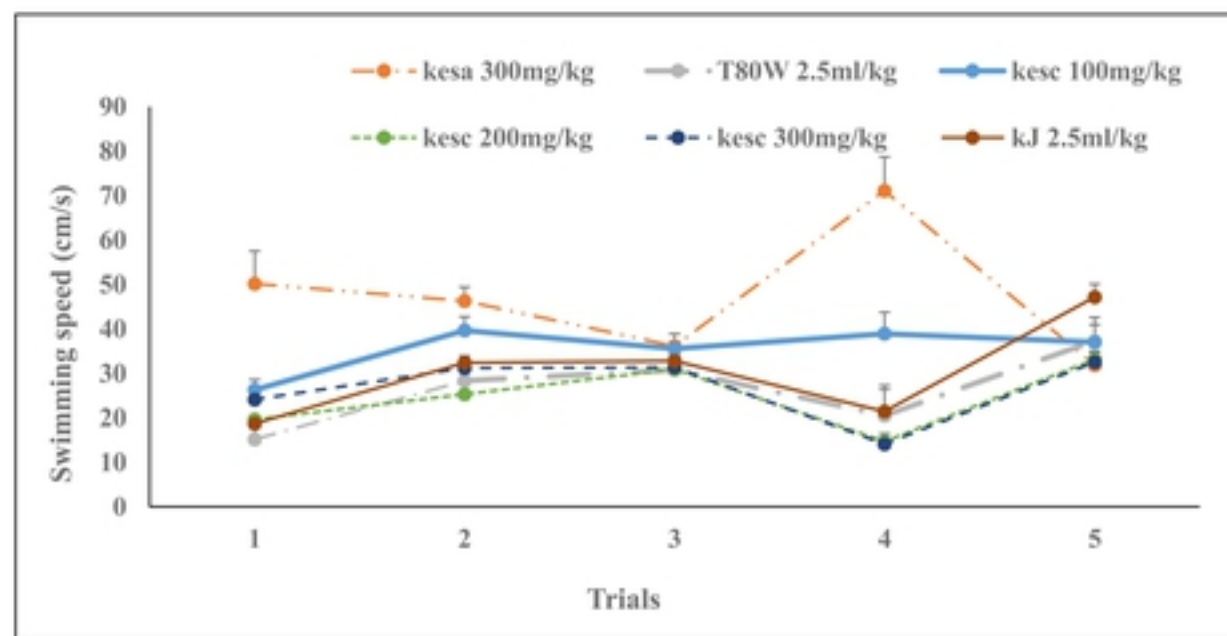

Figure

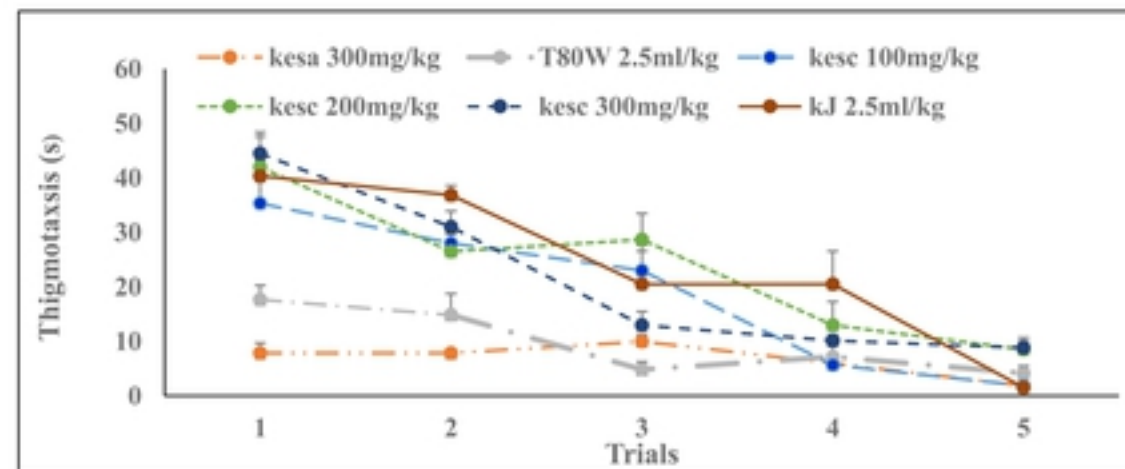

Figure

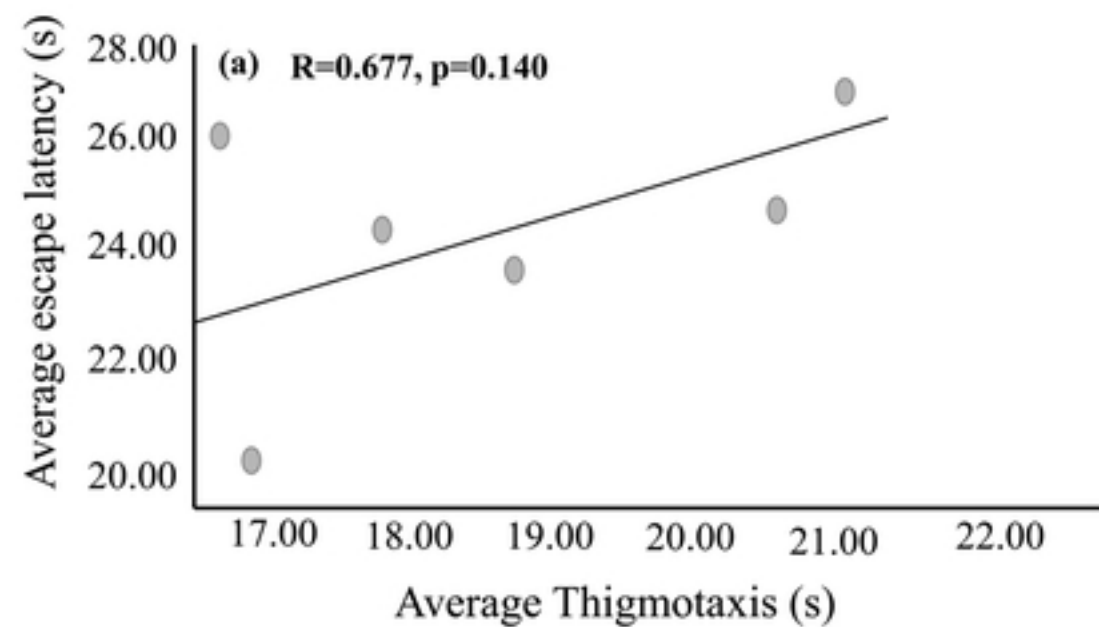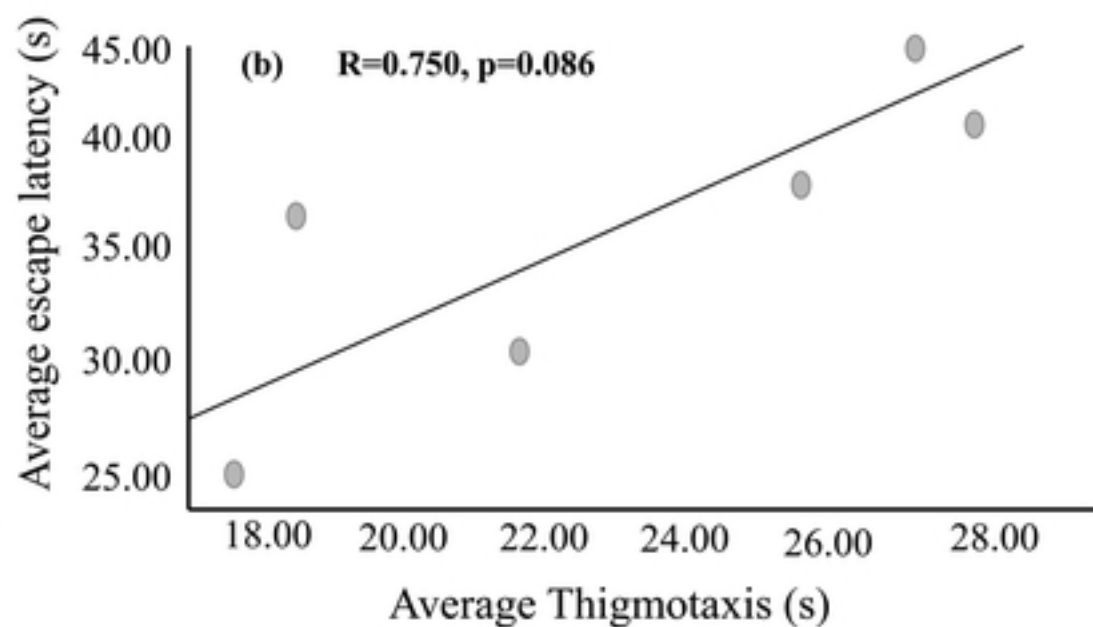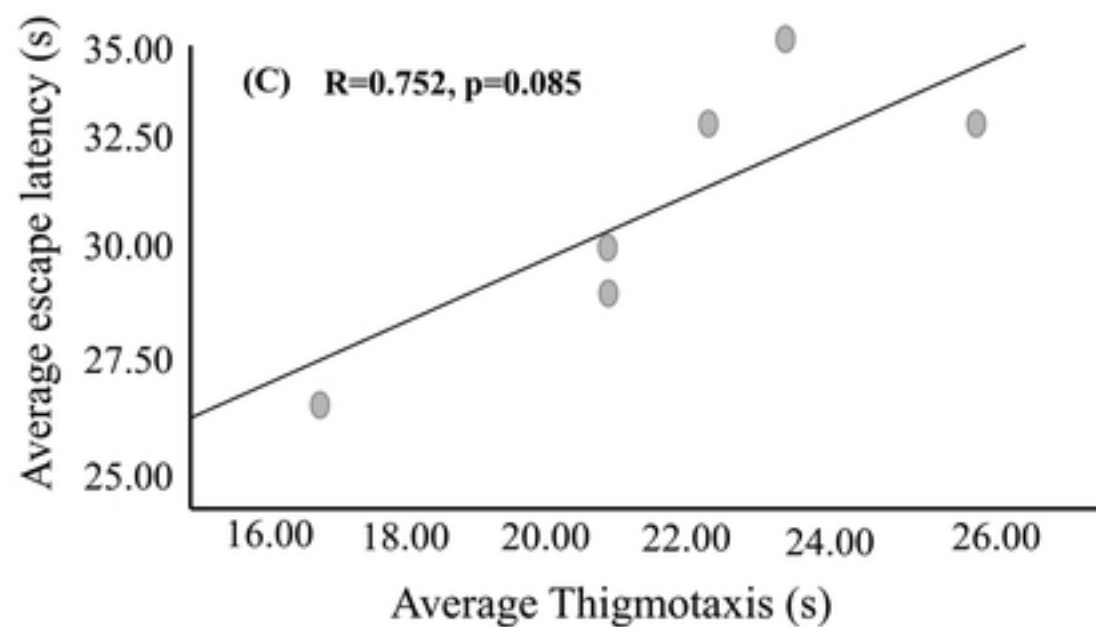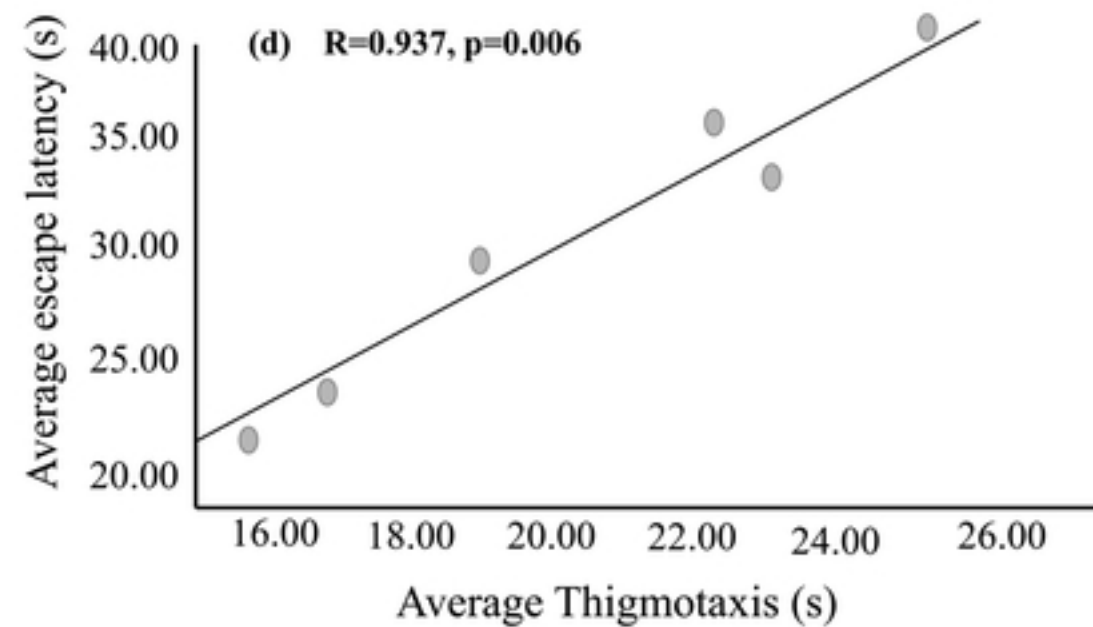

Figure

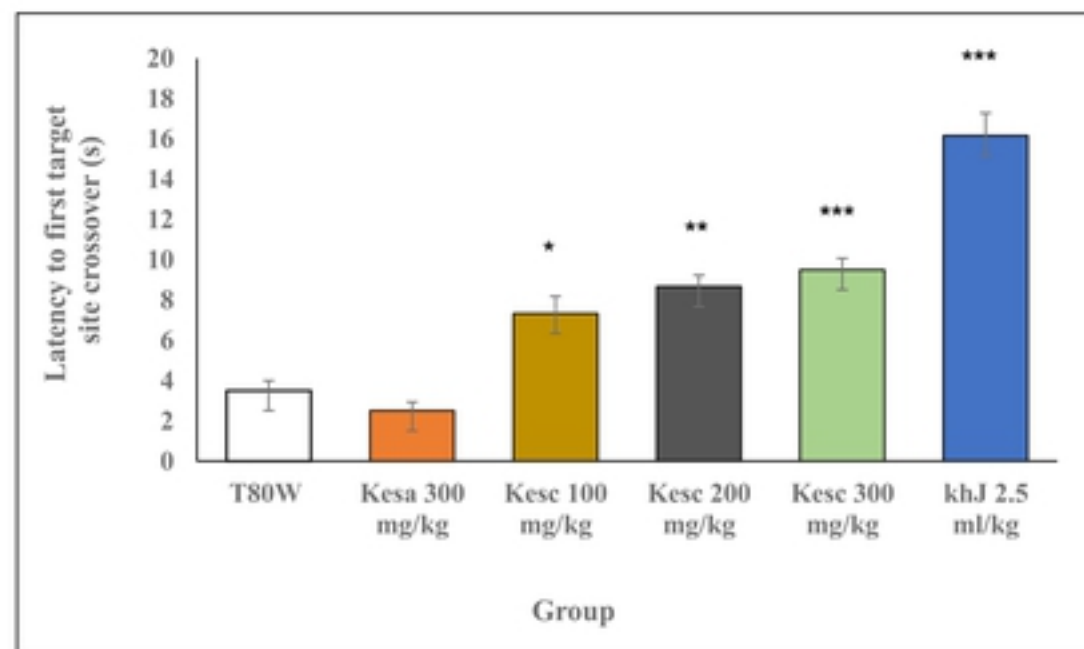

Figure

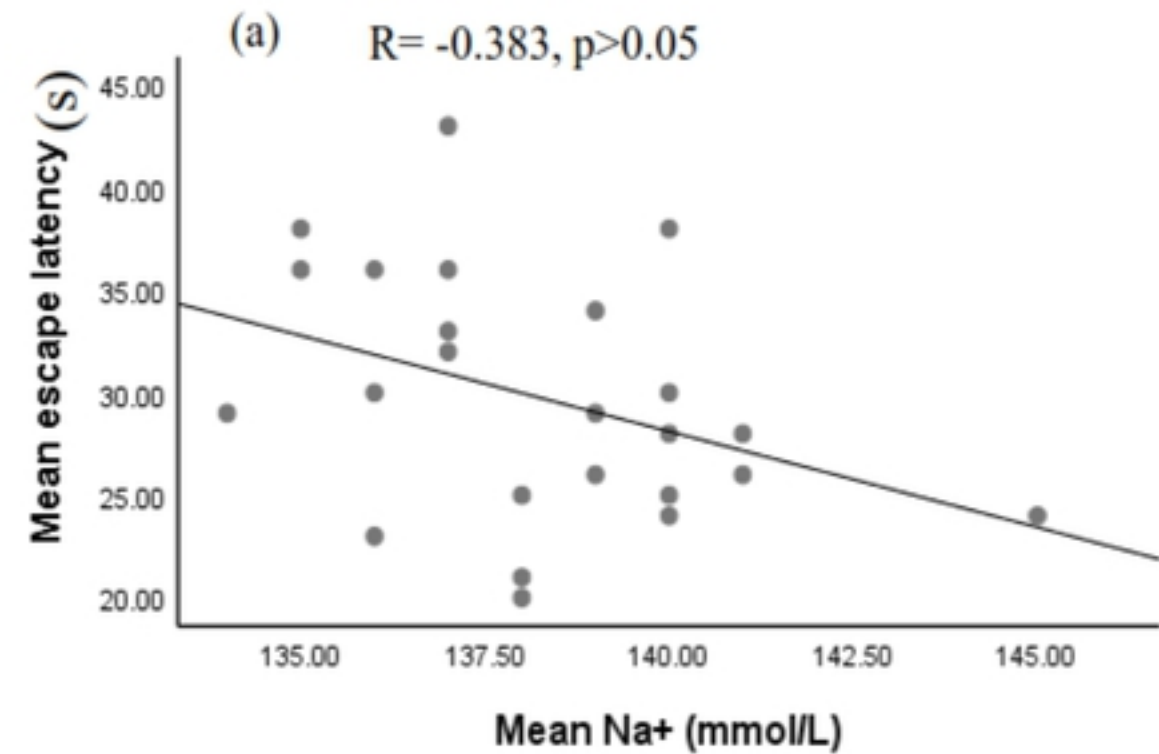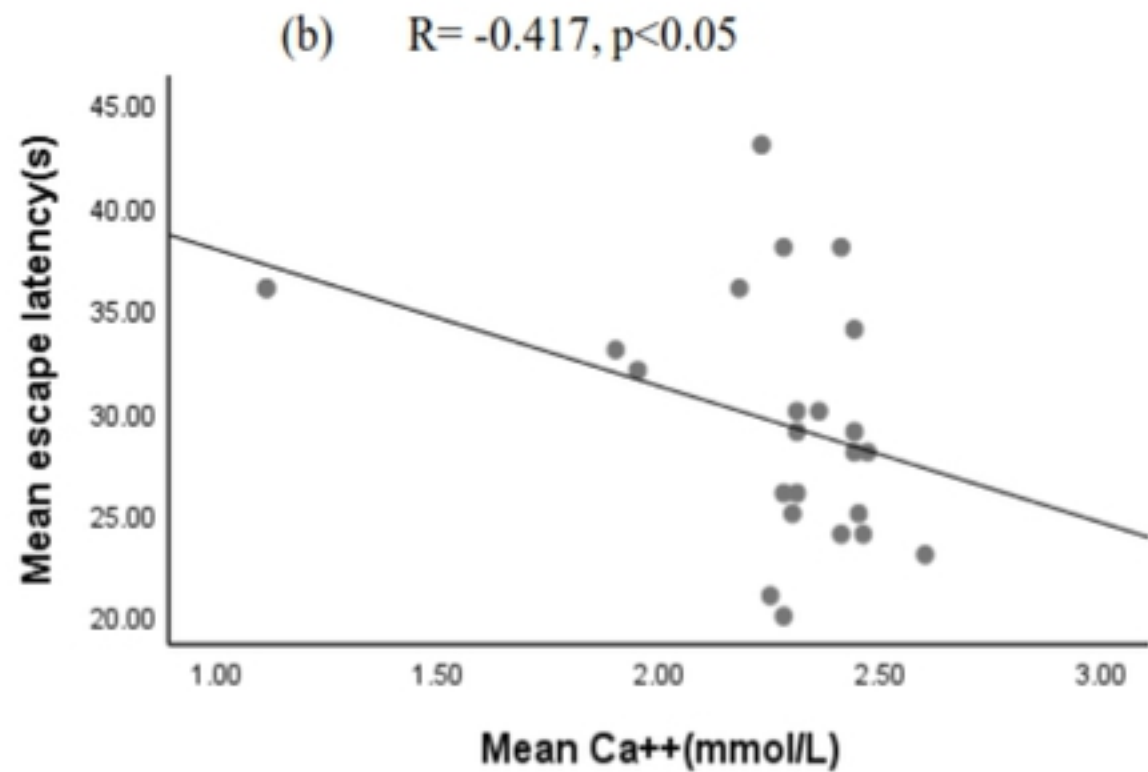

Figure
